# Supplementary material for: Parkin recruitment to impaired mitochondria for nonselective ubiquitylation is facilitated by MITOL
Source: PubMed Central journal article supplement (PMC6664184; doi:10.1074/jbc.ra118.006302), 2019-05-20
Supplement: supp_RA118.006302_141369_1_supp_315239_pqyymv.pdf [file supp_RA118.006302_141369_1_supp_315239_pqyymv.pdf]

## **Supporting Information**

### **Parkin recruitment to impaired mitochondria for nonselective ubiquitylation is facilitated by MITOL**

Fumika Koyano<sup>1</sup>, Koji Yamano<sup>1</sup>, Hidetaka Kosako<sup>2</sup>, Keiji Tanaka<sup>3</sup>, and \*Noriyuki Matsuda<sup>1</sup>

<sup>1</sup>Ubiquitin Project, Tokyo Metropolitan Institute of Medical Science, 2-1-6 Kamikitazawa, Setagaya, Tokyo 156-8506, Japan, <sup>2</sup>Division of Cell Signaling, Fujii Memorial Institute of Medical Sciences, Tokushima University, 3-18-15 Kuramoto-cho, Tokushima 770-8503, Japan,

<sup>3</sup>Laboratory of Protein Metabolism, Tokyo Metropolitan Institute of Medical Science, 2-1-6 Kamikitazawa, Setagaya, Tokyo 156-8506, Japan

\*To whom correspondence should be addressed: matsuda-nr@igakuken.or.jp

**Running title:** MITOL assists Parkin in mitochondrial localization

**Keywords:** Parkin, Parkinson's disease, mitophagy, ubiquitin, ubiquitin ligase

#### **Table of content**

Figure S1: The ubiquitylation and degradation pattern of Mt-MBP-HA and Mt-MBP-Ub-HA after CCCP and cycloheximide (CHX).

Figure S2: Endogenous MITOL was reduced in *MITOL*-knock down cells.

Figure S3: Statistical analysis of the subcellular localization of GFP-Parkin in HeLa cells stably expressing 3xFlag-MITOL WT or an E3-inactive C65S/C68S (CS) mutant following CCCP treatment.

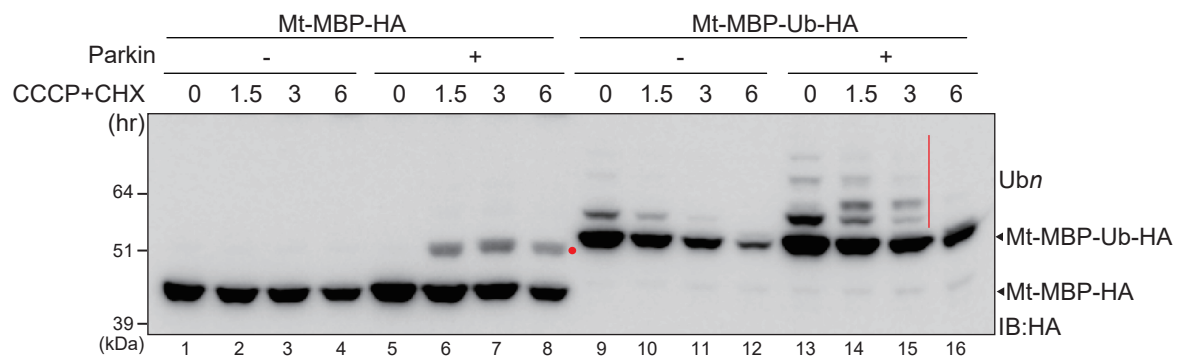

Figure S1.

Intact HeLa cells or HeLa cells stably expressing GFP-Parkin were transfected with Mt-MBP-HA or Mt-MBP-Ub-HA. They were then treated with 15  $\mu$ M CCCP + 50  $\mu$ g/ml cycloheximide (CHX) for the indicated times (hr), and then immunoblotted with an anti-HA antibody. The red dot and red bar indicate ubiquitylation of Mt-MBP-HA and Mt-MBP-Ub-HA, respectively.

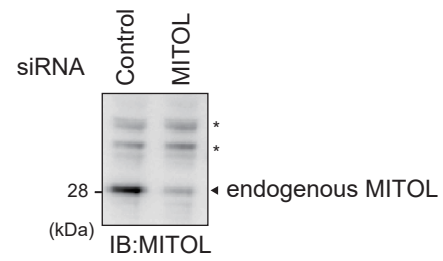

Figure S2.

HeLa cell lysates treated with control or *MITOL* siRNA were immunoblotted with an anti-*MITOL* antibody.

Endogenous *MITOL* was reduced in *MITOL*-knock down cells. The asterisks indicate cross-reacting bands.

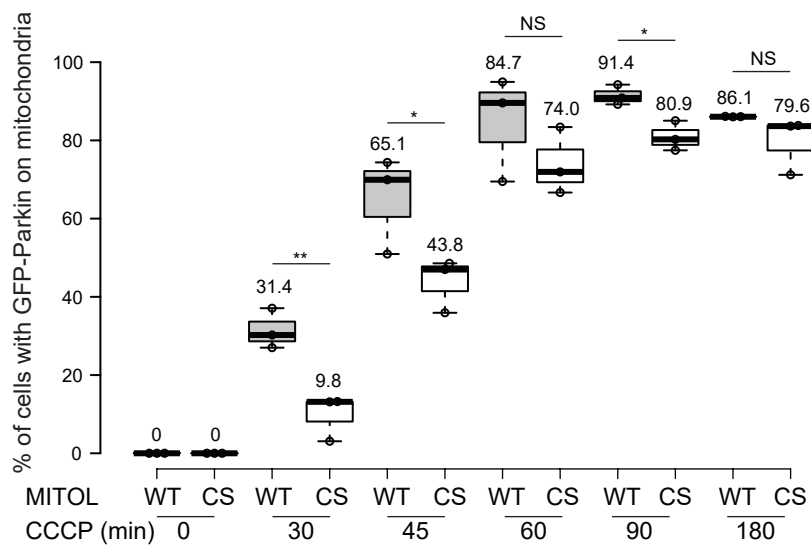

Figure S3.

Statistical analysis of the subcellular localization of GFP-Parkin in HeLa cells stably expressing 3xFlag-MITOL WT or an E3-inactive C65S/C68S (CS) mutant following 15  $\mu$ M CCCP treatment for the indicated times (min).

The percentages of cells with Parkin-positive mitochondria were calculated using > 100 cells.

Numbers in the box-and-whisker plot are mean values across three independent experiments.

Statistical significance was calculated using a one-tailed Welch's *t*-test. \*,  $P < 0.05$ ; \*\*,  $P < 0.01$ . NS, Not Significant.
